# Supplementary material for: Potassium 2-methoxy-4-vinylphenolate: a novel hit exhibiting quorum-sensing inhibition inPseudomonas aeruginosa viaLasIR/RhlIR circuitry
Source: Royal Society of Chemistry journal article supplement (doi:10.1039/c9ra06612h), 2019-01-01
Supplement: c9ra06612h1.pdf [file c9ra06612h1.pdf]

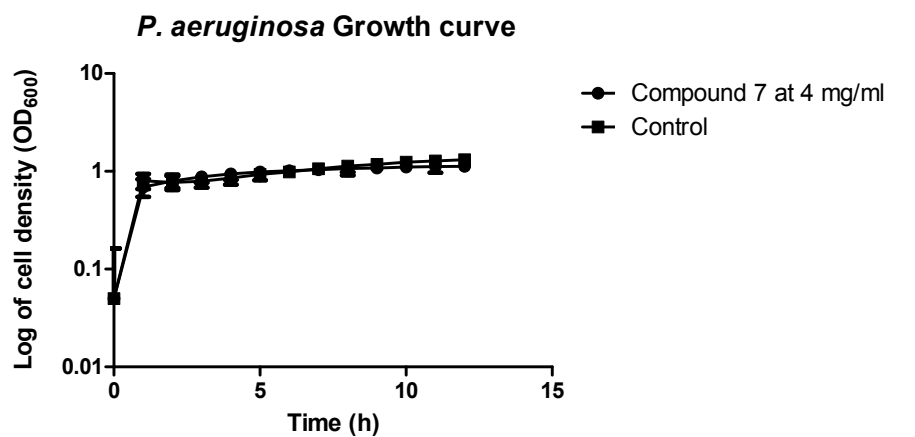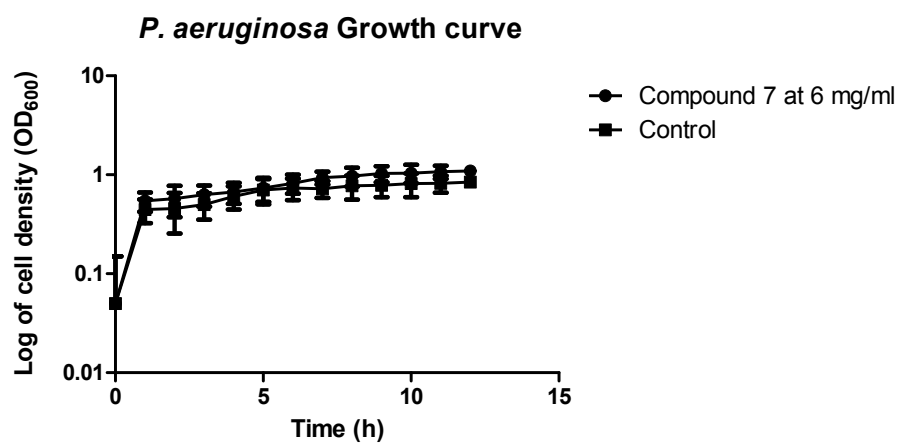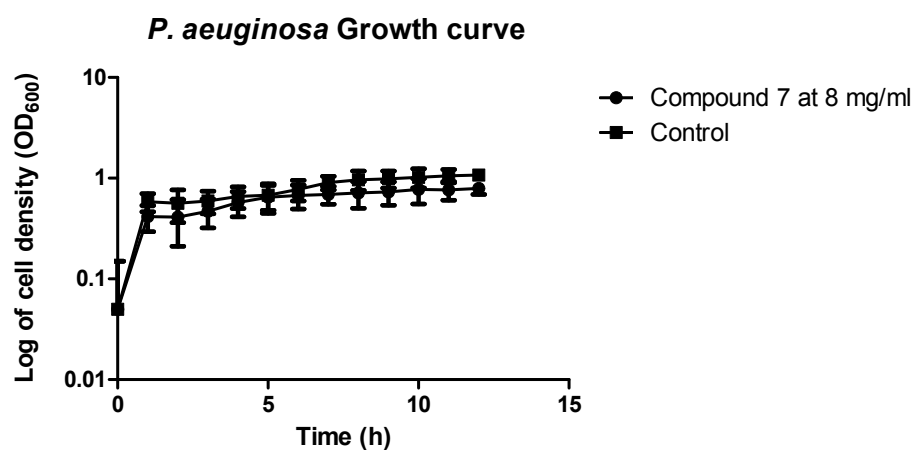

Fig. S1. Growth curve analysis in dose dependent manner.

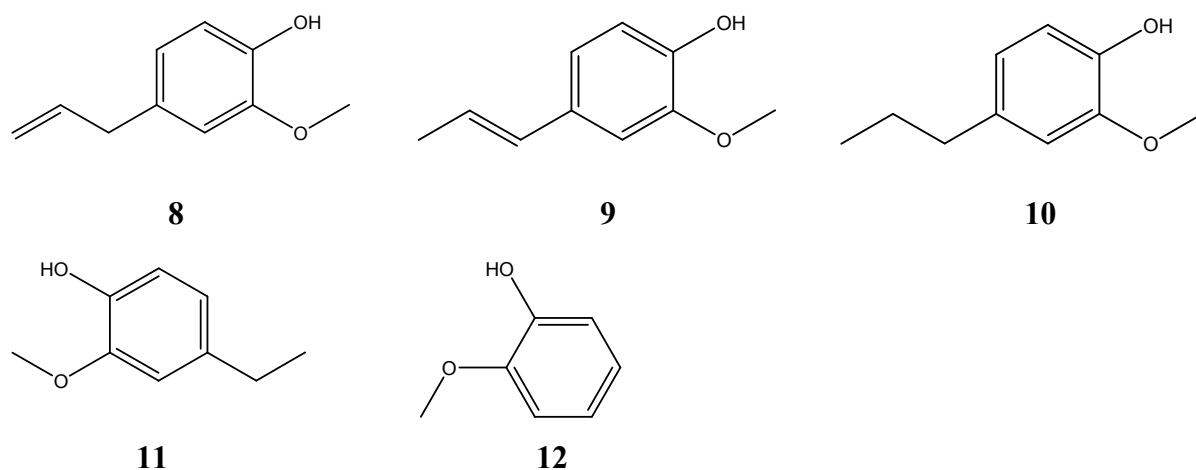

**Fig. S2. Chemical structures of compounds inhibited biofilm formation in gram negative bacteria. Eugenol (8), Isoeugenol (9), 2-methoxy-4-propylphenol (10), 4-ethylguaiacol (11), guaiacol (12)**

| No.      | Gene Name            | Primer sequence (5'-3') | Amplicon size (bp) |
|----------|----------------------|-------------------------|--------------------|
| <b>1</b> | <b><i>lasI</i> F</b> | GGCTGGGACGTTAGTGTCAT    | <b>104</b>         |
|          | <b><i>lasI</i> R</b> | AAAACCTGGGCTTCAGGAGT    |                    |
| <b>2</b> | <b><i>lasR</i> F</b> | ACGCTCAAGTGGAAAATTGG    | <b>111</b>         |
|          | <b><i>lasR</i> R</b> | TCGTAGTCCTGGCTGTCCTT    |                    |
| <b>3</b> | <b><i>rhlI</i> F</b> | AAGGACGTCTTCGCCTACCT    | <b>130</b>         |
|          | <b><i>rhlI</i> R</b> | GCAGGCTGGACCAGAATATC    |                    |
| <b>4</b> | <b><i>rhlR</i> F</b> | CATCCGATGCTGATGTCCAACC  | <b>101</b>         |
|          | <b><i>rhlR</i> R</b> | ATGATGGCGATTTCCTCCGGAAC |                    |
| <b>5</b> | <b><i>rpsL</i> F</b> | GCAACTATCAACCAGCTGGTG   | <b>231</b>         |
|          | <b><i>rpsL</i> R</b> | GCTGTGCTCTTGCAGGTTGTG   |                    |

**Table S1. PCR primers for real time PCR**

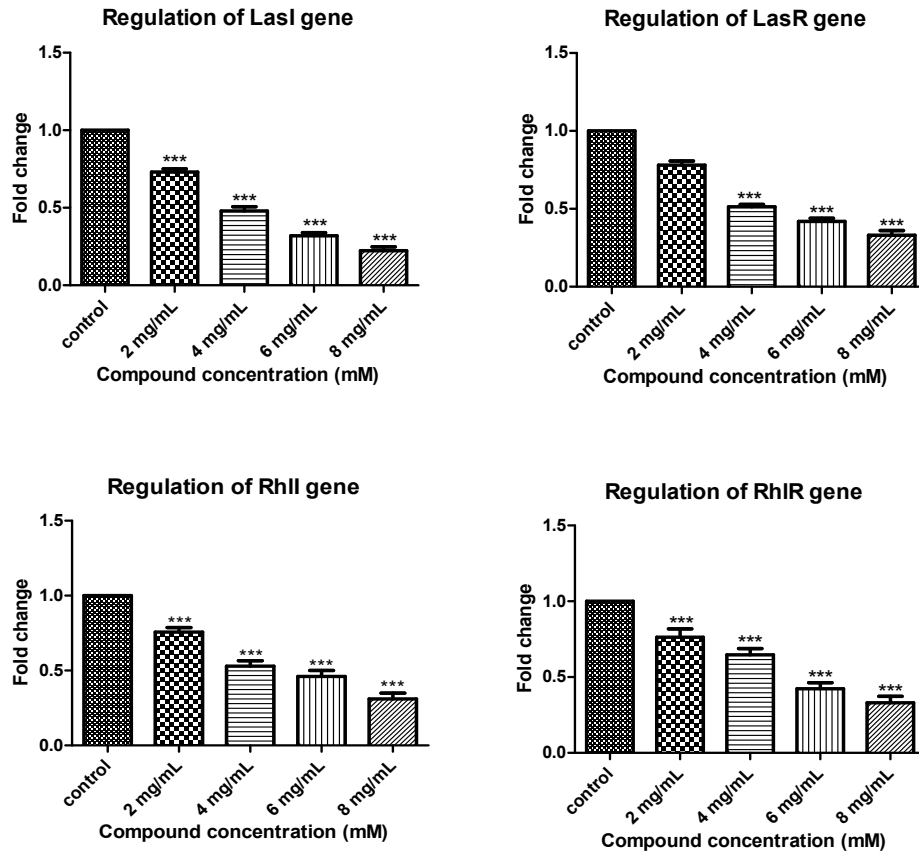

**Fig. S3.** Effect of compound 7 on *lasI*, *lasR*, *rhII*, and *rhIR* genes in *P. aeruginosa*
